# Supplementary material for: Biological activity of human mesenchymal stromal cells on polymeric electrospun scaffolds
Source: Royal Society of Chemistry journal article supplement (doi:10.1039/c8bm00693h), 2018-12-21
Supplement: c8bm00693h1.pdf [file c8bm00693h1.pdf]

## Supplementary Information

### **Biological activity of human mesenchymal stromal cells on polymeric electrospun scaffolds**

Febriyani F.R. Damanik<sup>1,2</sup>, Gabriele Spadolini<sup>1,3</sup>, Joris Rotmans<sup>4</sup>, Silvia Fare<sup>3</sup>, Lorenzo Moroni<sup>1,2</sup>

<sup>1</sup>University of Twente, Drienerlolaan 5, Zuidhorst 145, 7522 NB Enschede, the Netherlands

<sup>2</sup>Maastricht University, MERLN Institute for Technology-Inspired Regenerative Medicine, Universiteitsingel 40, 6229 ER Maastricht, the Netherlands

<sup>3</sup>Politecnico di Milano, Department of Chemistry, Materials and Chemical Engineering "G. Natta", Piazza L. Da Vinci 32, Milan, Italy.

<sup>4</sup> Department of Internal Medicine, Leiden University Medical Center, Albinusdreef 2, 2333ZA Leiden, The Netherlands

Corresponding Author: Lorenzo Moroni. E-mail: [l.moroni@maastrichtuniversity.nl](mailto:l.moroni@maastrichtuniversity.nl)

**Supplementary Table 1. List of parameters on different polymers**

| Polymer | Concentration (%) | Flow rate (ml/h) | Working distance (cm) | Voltage (kV) |
|---------|-------------------|------------------|-----------------------|--------------|
| PCL     | 10 - 20           | 1 - 12.5         | 20 - 25               | 15 – 25      |
| PLA     | 10 – 15           | 0.5 - 10         | 15 - 20               | 12 – 15      |
| PA      | 18 – 20           | 1 - 20           | 20 - 25               | 15           |

**Supplementary Table 2. Primer sequences**

| Gene   | Forward Primer          | Reverse Primer         |
|--------|-------------------------|------------------------|
| ALP    | ACAAGCACTCCCACTTCATC    | TTCAGCTCGTACTGCATGTC   |
| Sox9   | TGGGCAAGCTCTGGAGACTTC   | ATCCGGGTGGTCCTTCTTG TG |
| Col-1a | GAGGGCCAAGACGAAGACATC   | CAGATCACGTCATCGCACAAAC |
| Col-2a | CGTCCAGATGACCTTCTACG    | TGAGCAGGGCCTTCTTGAG    |
| ALCAM  | ACGATGAGGCAGACGAGATAAGT | CAGCAAGGAGGAGACCAACAA  |
| BMP2   | ACTACCAGAAACGAGTGGGAA   | GCATCTGTTCTCGGAAAACCT  |
| OPN    | GGTGATGTCCTCGTCTGTA     | CCAAGTAAGTCCAACGAAAG   |
| OCN    | TGAGAGCCCTCACACTCCTC    | CGCCTGGGTCTCTTCACTAC   |
| Runx2  | GGAGTGGACGAGGCAAGAGTTT  | AGCTTCTGTCTGTGCCTTCTGG |
| GAPDH  | CGCTCTGCTCCTCTGTT       | CCATGGTGTCTGAGCGATGT   |
| OCT4   | CTCACCTGGGGGTTCTATT     | CTCCAGGTTGCCTTCACTC    |
| CD63   | GCCCTTGAATTGCTTTTGTCG   | CATCACCTCGTAGCCACTTCTG |

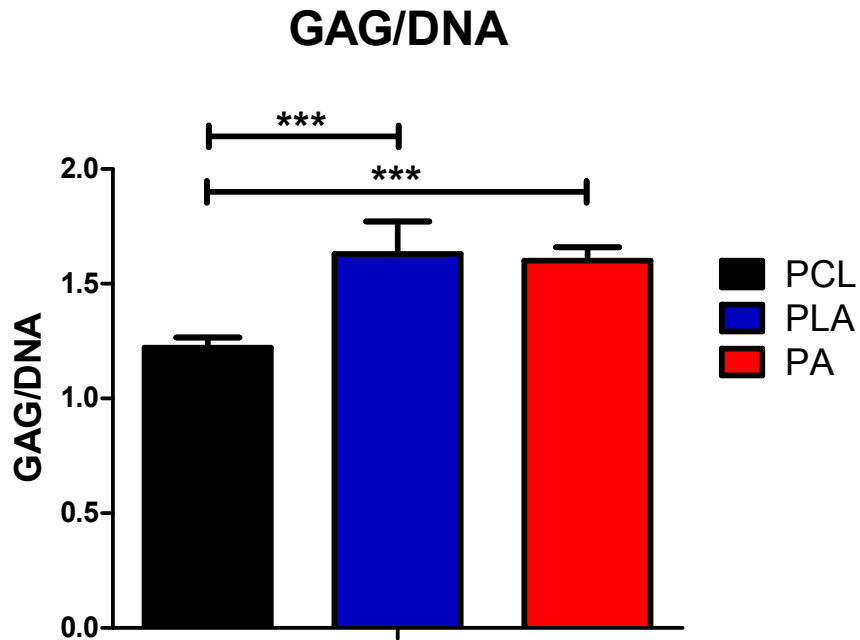

**Supplementary Figure 1. Normalization of GAG over DNA content at day 14.** PLA and PA scaffolds showed statistically higher GAG/DNA content than PCL scaffolds. Data shown as mean  $\pm$  s.d. (n=6). Stars (\* $P < 0.05$ , \*\* $P < 0.01$ , \*\*\* $P < 0.001$ ) indicate statistically significant values in comparison to each scaffold type to one another.

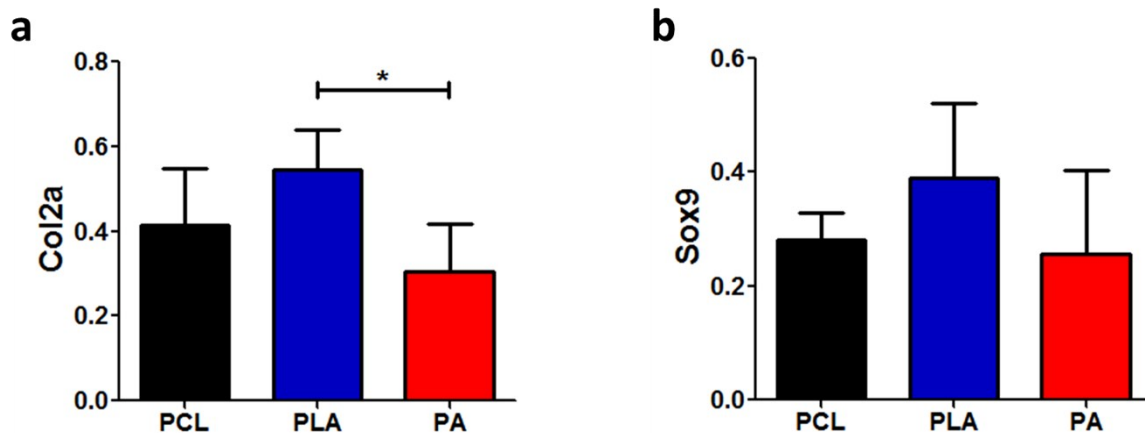

**Supplementary Figure 2.** Chondrogenic marker, Col2a and Sox9 showed downregulation in all electrospun scaffold type. Statistical analysis was done by One-way Analysis of Variance (ANOVA) with Bonferroni's multiple comparison test ( $p < 0.05$ ). Black stars (\* $P < 0.05$ , \*\* $P < 0.01$ , \*\*\* $P < 0.001$ ) indicate statistically significant values in comparison to each scaffold type to one another

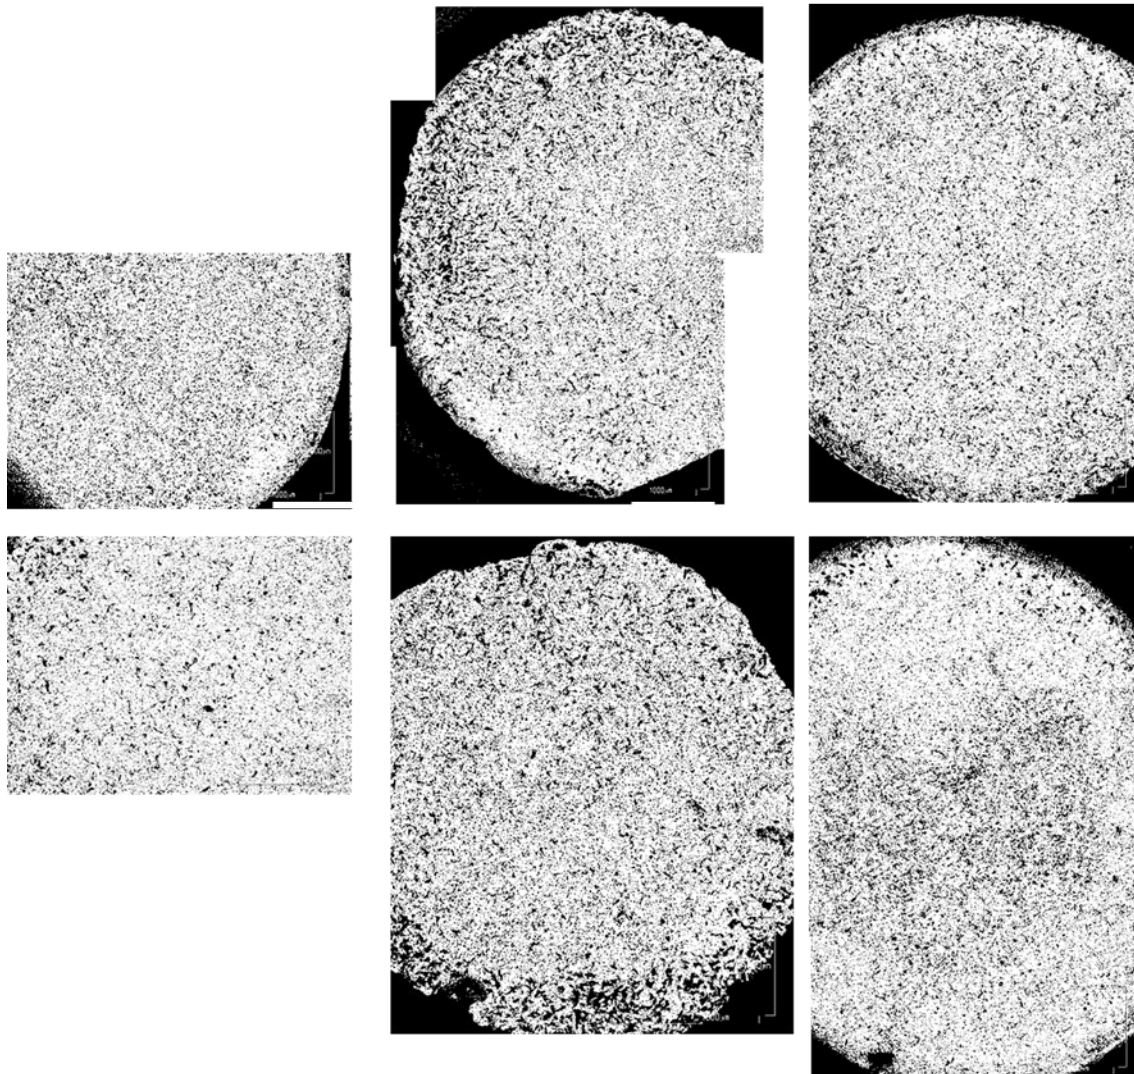

**Supplementary Figure 3.** Cell migration study on unloaded and loaded PA scaffolds. Inverted light microscope images of stained transwell inserts showing the migrating cell in a black and white contrast view. Scale bar: 1000  $\mu\text{m}$ .
